# Supplementary material
Source: PubMed Central journal article supplement (PMC4245969)
Supplement: supp_gku870_nar-02119-met-g-2014-File003.pdf [file supp_gku870_nar-02119-met-g-2014-File003.pdf]

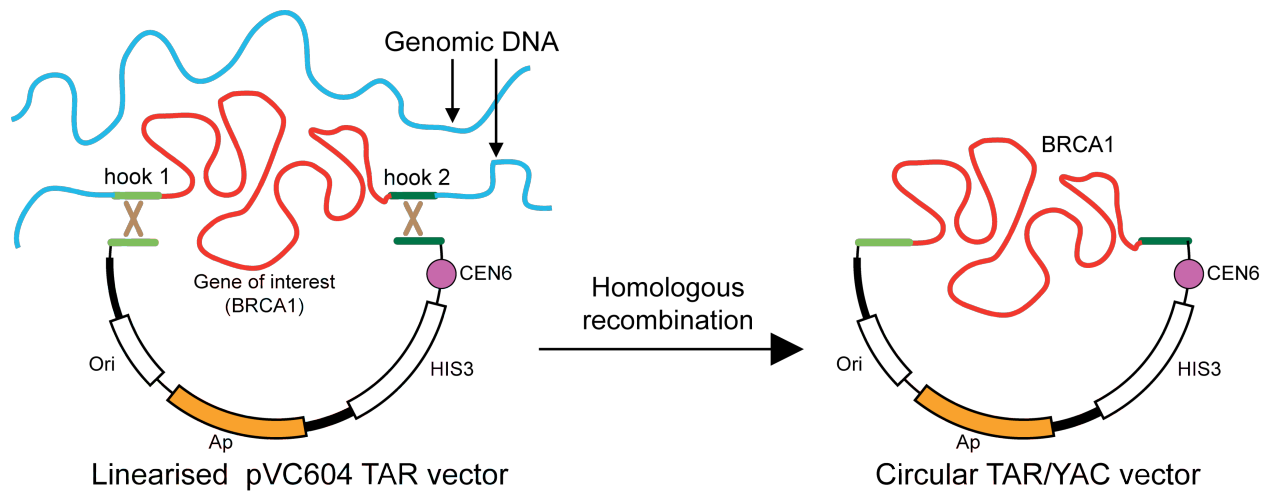

**Figure S1.** The diagram shows TAR cloning of the *BRCA1* gene from total human genomic DNA with a linearized pVC604 TAR vector containing two unique targeting sequences (hooks) homologous to a gene of interest. After transformation into yeast *Saccharomyces cerevisiae* cells, recombination between targeting sequences in the vector and the targeted sequences of the genomic DNA fragment carrying *BRCA1* leads to the rescue of the gene as a circular TAR/YAC molecule. For TAR cloning experiments, the TAR vector DNA is linearized at a unique restriction site located between the hooks to expose targeting sequences (hooks).

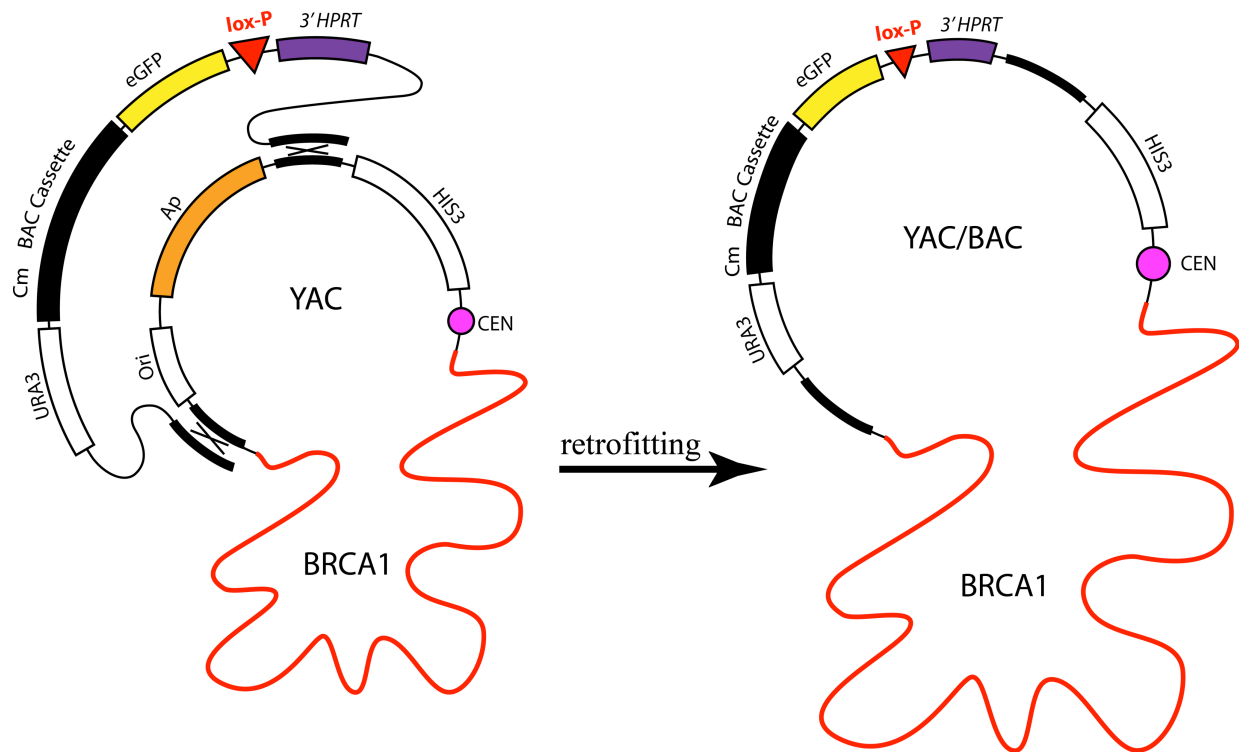

**Figure S2.** Schematic representation of retrofitting a circular TAR/YAC carrying the full-length *BRCA1* gene into a YAC/BAC using the pJBRV1 vector containing the *URA3* yeast selectable marker, a BAC cassette containing the F' factor origin of replication (*F'*), the chloramphenicol acetyltransferase (*Cm*) gene and a 3'HPRT-loxP cassette allowing gene loading into a unique loxP site of the alphoid<sup>tet<sup>0</sup></sup>-HAC in Hprt-deficient hamster CHO cells by Cre-loxP mediated recombination. A standard lithium acetate transformation procedure was used for retrofitting of a YAC into a BAC/YAC form. Recombination between targeting sequences in the vector and homologous regions in the YAC molecule replaces the *ColEI* origin of replication but the *F'*-factor origin of replication that allows propagation of a molecule in bacterial cells. The YAC/BACs were moved to *Escherichia coli* by electroporation.

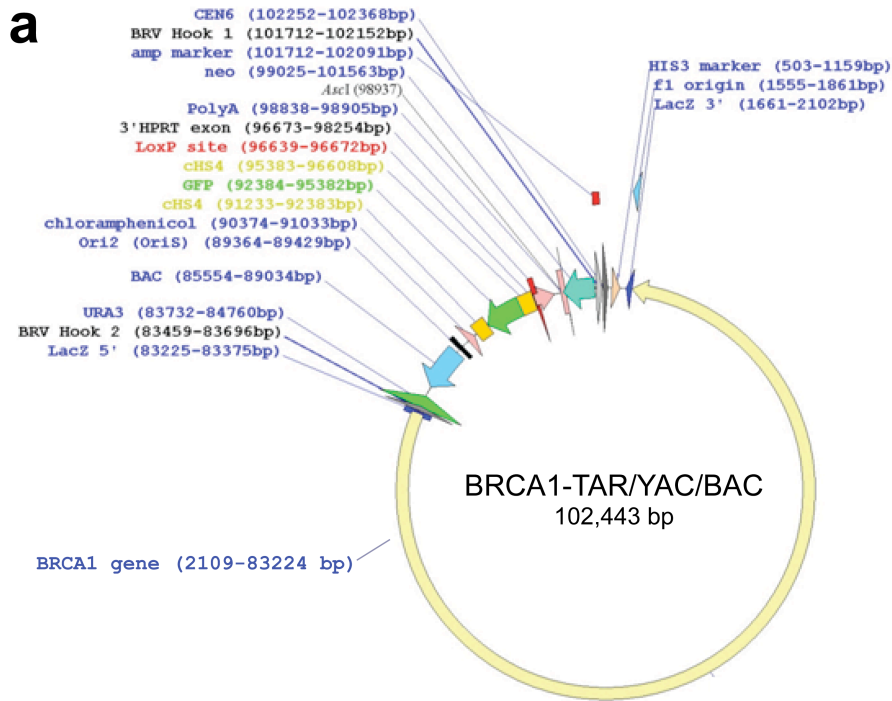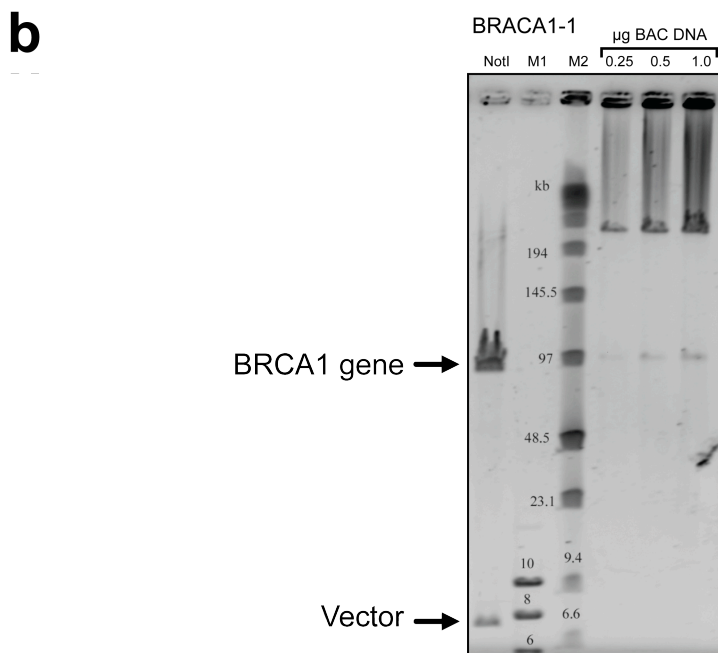

**Figure S3. (a)** Map of BRCA1-TAR/YAC/BAC used for loading the gene into alphoid<sup>tetO</sup>-HAC. **(b)** CHEF gel to verify the quality and integrity of BRCA1-YAC/BAC preparation. BRCA1-1 is a randomly selected BRCA1-TAR/YAC/BAC *E. coli* clone. The first sample lane is NotI digested BRCA1-1 BAC DNA. 0.25µg, 0.5µg and 1µg of uncut BRCA1-1 BAC were loaded onto the gel. As seen, a purified BRCA1 BAC DNA is predominately presented by covalently closed circular (ccc) molecules. M1 is the 2-log DNA ladder (NEB). M2 is the Pulse Marker 0.1-200kb (Sigma).

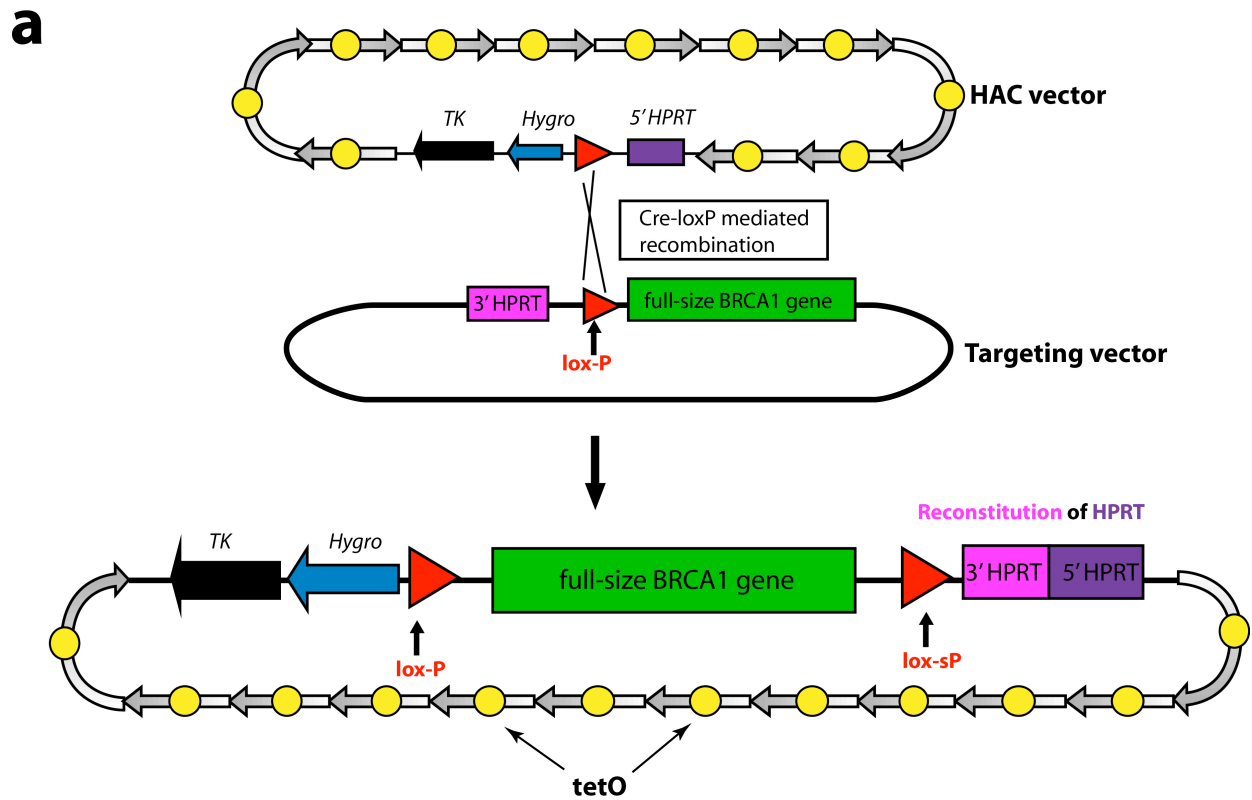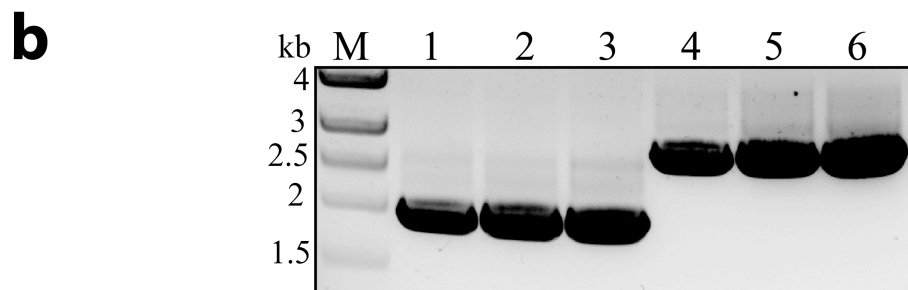

**Figure S4. (a)** The *BRCA1* gene loading into the aliphoid<sup>tetO</sup>-HAC vector propagated in Hprt-deficient hamster CHO cells by Cre-loxP mediated recombination. Loading of the targeting vector along with the *BRCA1* gene into the loxP site of the aliphoid<sup>tetO</sup>-HAC is accompanied by reconstitution of the *HPRT* gene allowing cells selection on HAT medium. **(b)** PCR reactions confirming reconstitution of the *HPRT* gene. Lanes 1, 2, 3, and 4, 5, 6 correspond to PCR products obtained with the genomic DNA isolated from aliphoid<sup>tetO</sup>-HAC /*BRCA1*-containing clones of CHO cells using a set of specific primers (Table S1). One clone was chosen for further MMCT transfer to human *Brc1*-deficient UWB1.289 cells.

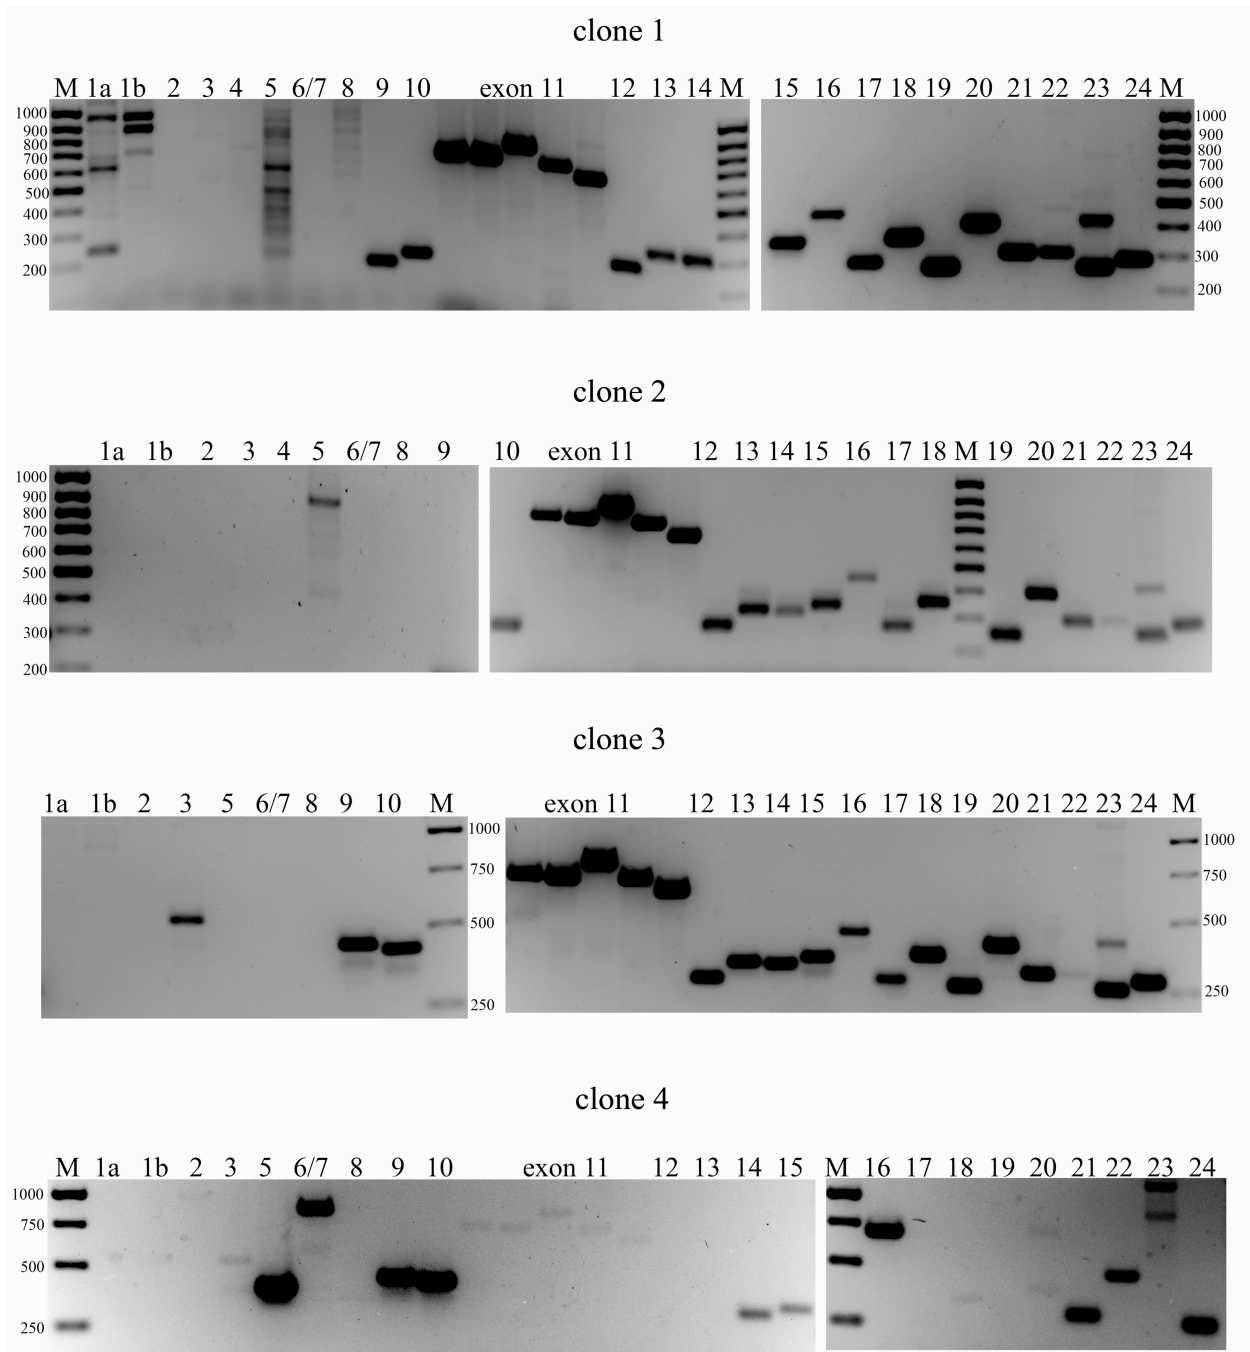

**Figure S5.** Integrity of the *BRCA1* gene after its loading into alphoid<sup>tet<sup>O</sup></sup>-HAC in CHO cells. PCR analysis of *BRCA1* exons is shown for four randomly chosen CHO clones selected on HAC medium. As seen, each clone contains a *BRCA1* sequence with a different size of internal deletions.

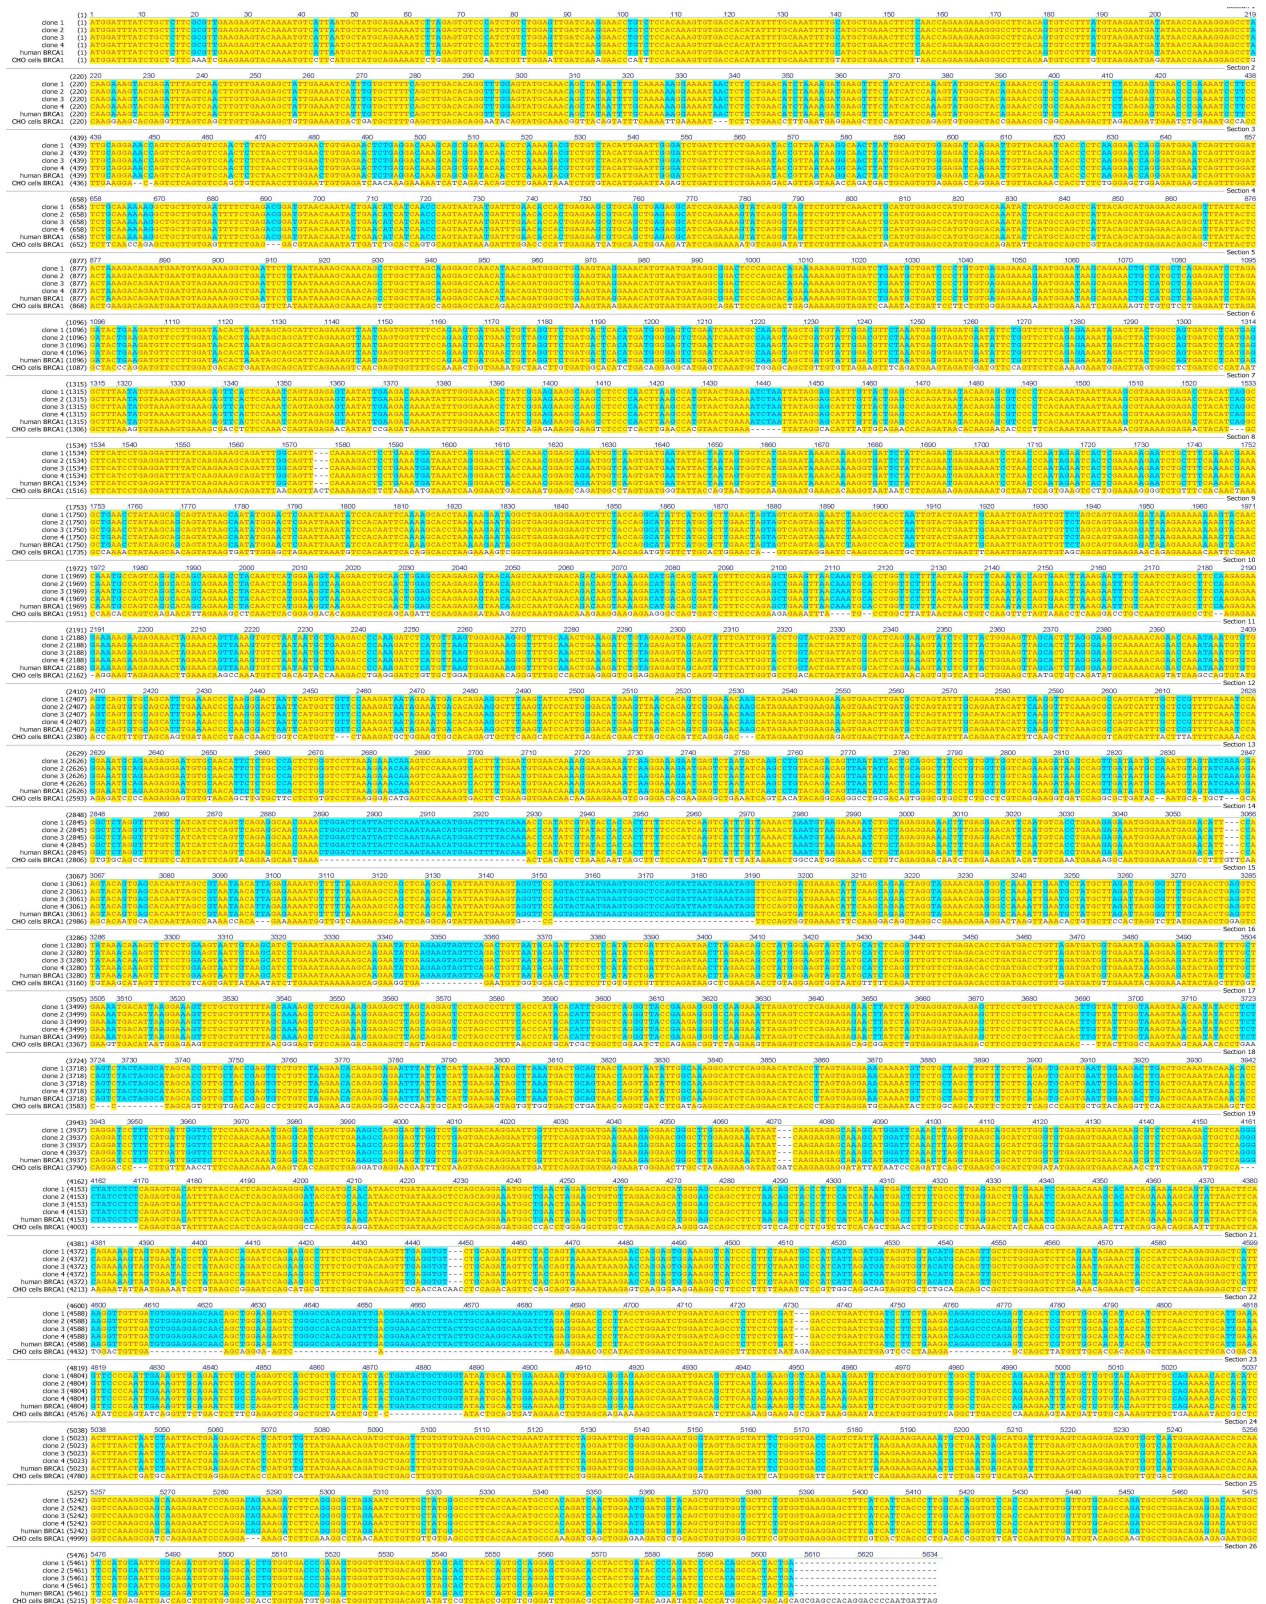

**Figure S6.** Sequence alignment of *BRCA1* mRNA obtained by RT-PCR from four CHO clones (1-4) containing the not arranged *BRCA1* sequences. As seen, the sequences are identical to a wild type mRNA of *BRCA1*. The sequence of the hamster *BRCA1* mRNA is also included.

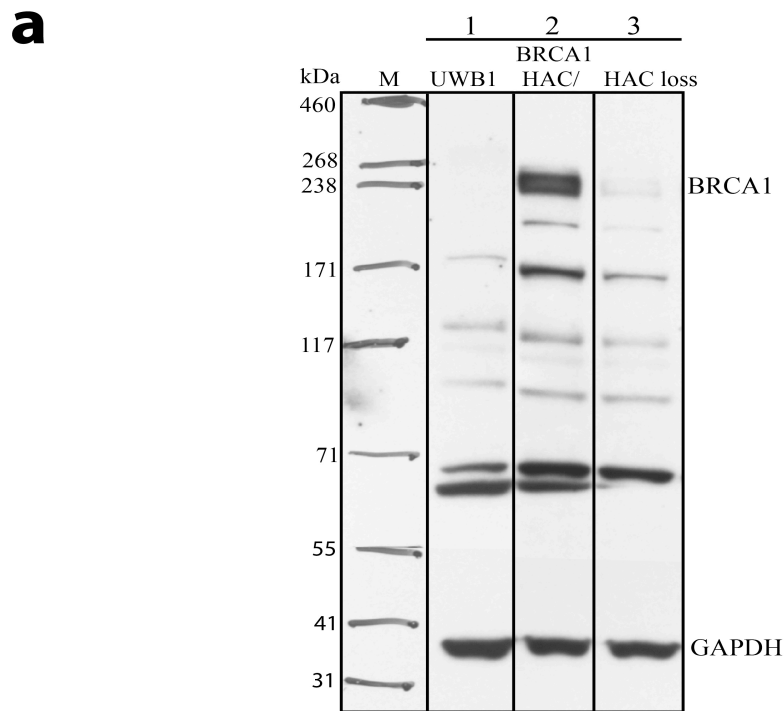

**b**

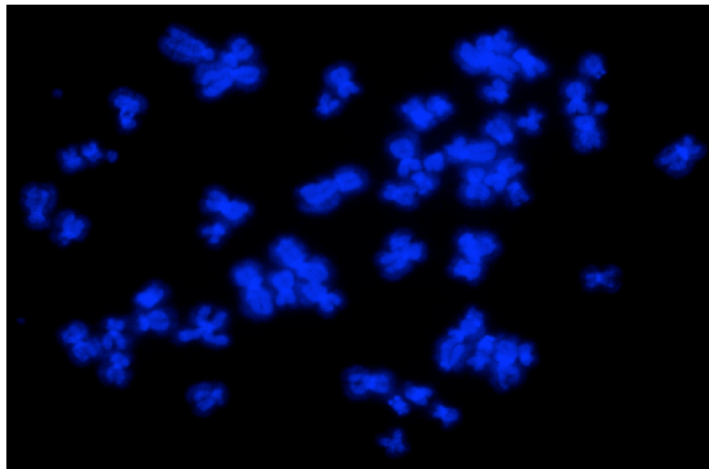

**Figure S7. (a)** Western blot analysis of alphoid<sup>tetO</sup>-HAC/BRCA1-containing UWB1.289 cells (lane 2) and the same cells after elimination of the HAC (lane 3) by expression of the *tTS* fusion construct using human-specific Abs against BRCA1. Lanes 1 corresponds to the original UWB1.289 cell line. M-ladder. **(b)** FISH analysis of human UWB1.289 cells after expression of the *tTS*-tet-R fusion construct. FISH was performed using the labeled probe for tetO-alphoid sequences of the HAC. Chromosomal DNA was counterstained with DAPI (blue). As seen, the alphoid<sup>tetO</sup>-HAC/BRCA1 is lost from the cells.

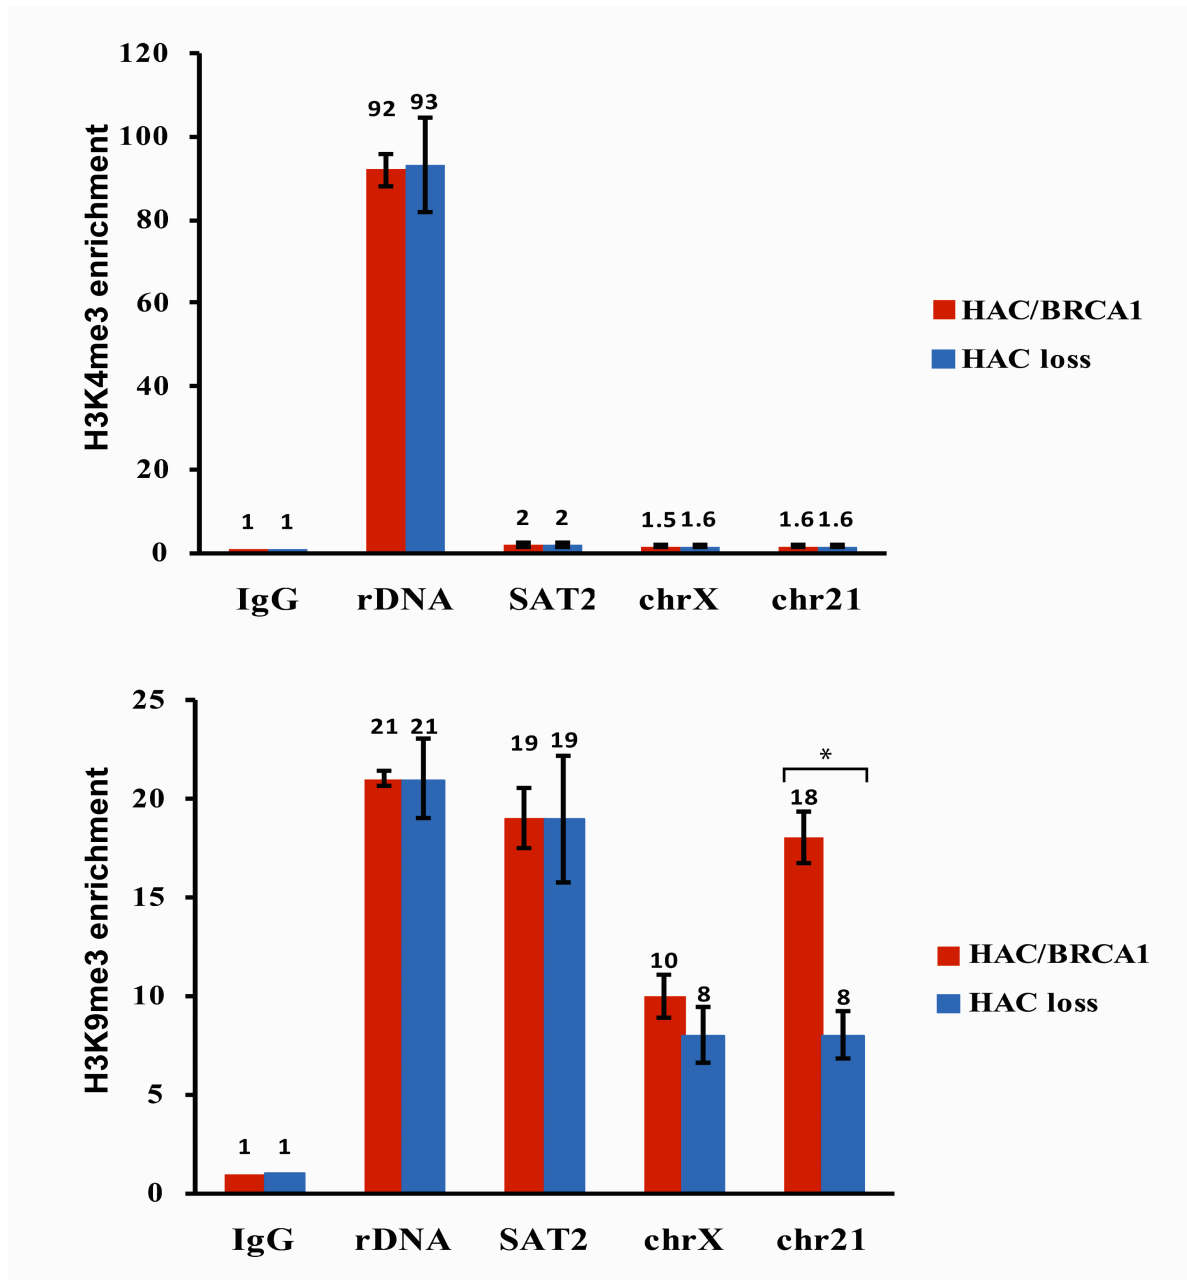

**Figure S8.** Chromatin immunoprecipitation (ChIP – PCR) analysis of HORs in chromosomes 21 and X using antibodies against H3K4me3 (upper) and H3K9me3 (lower) in the in Brca1-deficient UWB1.289 cells containing alphoid<sup>tetO</sup>-HAC /BRCA1 and in the same cells that have lost the HAC.



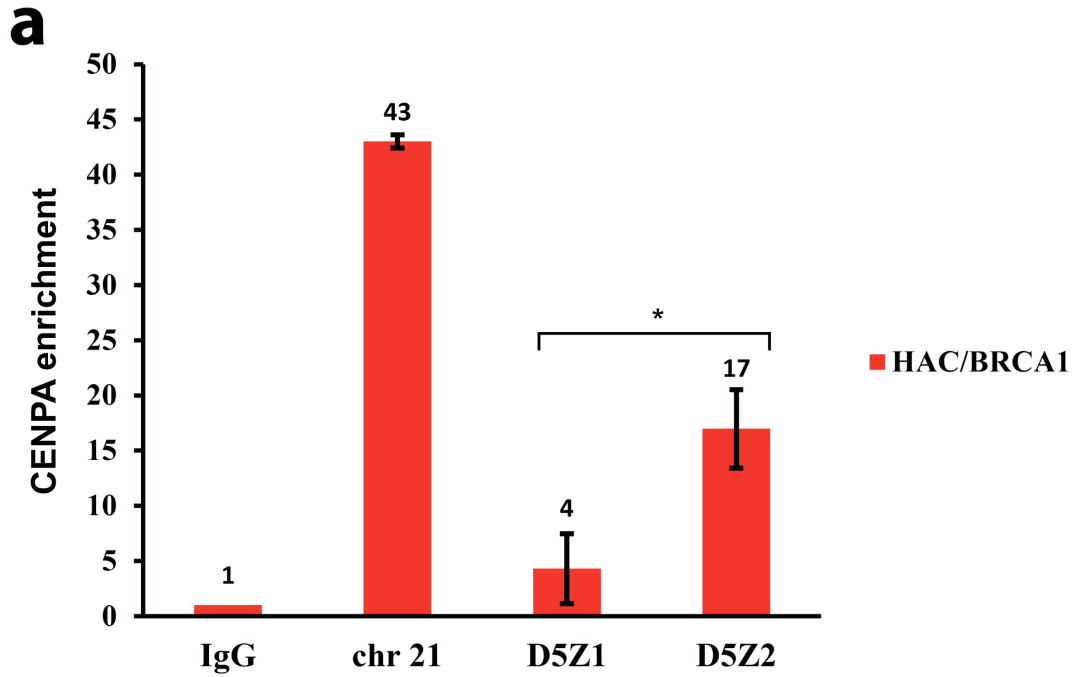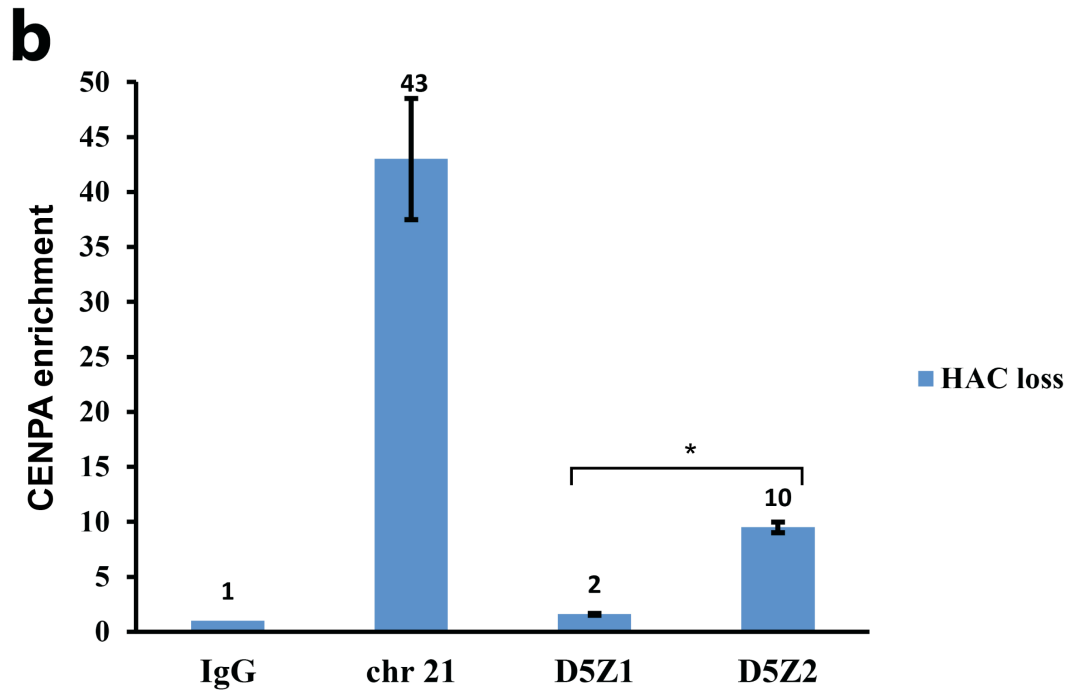

**Figure S9.** Chromatin immunoprecipitation (ChIP –PCR) analysis of different HORs using antibodies against CENP-A (centromeric protein A) in BRCA1-deficient UWB1.289 cells containing alphoid<sup>tet<sup>O</sup></sup>-HAC/BRCA1 and in the same cells that have lost the HAC. As seen, CENP-A chromatin is enriched on D5Z2 arrays.

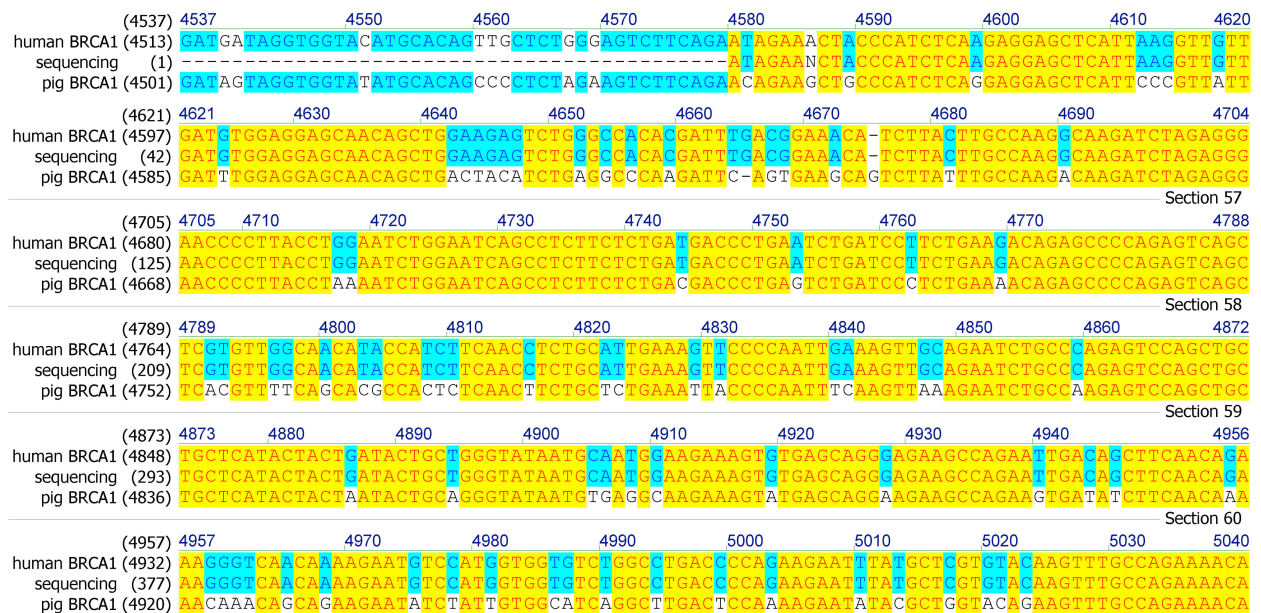

**Figure S10.** Alignment of human and porcine *BRCA1* mRNA sequences. For simplicity, the sequences corresponding to exons 15-17 are shown. A middle line corresponds to RT-PCR product risen from total mRNA isolated from ST porcine cells carrying the  $\text{tet}^{\text{O}}$  - HAC/*BRCA1*.

**Table S1 Primers used in this study**

| <b>Amplification of exons of the human BRCA1 gene</b> |                                    |
|-------------------------------------------------------|------------------------------------|
| Exon 1a_F                                             | 5' ATTGGGACCTCTTCTTACGAC 3'        |
| Exon 1a_rev                                           | 5' GTCAGCTTCGGAAATCCAC 3'          |
| Exon 1b_F                                             | 5' AGAGTGGATTTCCGAAGCTG 3'         |
| Exon 1b_rev                                           | 5' CAAATGGATCCAGTTCTTAAGTTC 3'     |
| BRCA1 Exon 2f-1                                       | 5' TTTAAAATGATAAAAATGAAGTTGTC 3'   |
| BRCA1 Exon 2rev-1                                     | 5' ATCATTTTCTATATTTTAAAGTTCTTC 3'  |
| BRCA1 Exon 3f-1                                       | 5' TTGATATCTGAAAGCTCACTG 3'        |
| BRCA1 Exon 3rev-1                                     | 5' TTTCGTTCTCACTTAATTGAAG 3'       |
| Exon 4F                                               | 5' TCAAAGAGATAGAATGTGAGC 3'        |
| Exon 4R                                               | 5' CCCGTCTCTACAGAAAACAC 3'         |
| BRCA1 Exon 5f-1                                       | 5' AACAATTAGGAAACTATTGCTTG 3'      |
| BRCA1 Exon 5rev-1                                     | 5' AAAACTTTCAGGAAAATAACTTTG 3'     |
| BRCA1 Exon 6/7f-1                                     | 5' GTTTCTCAAACAATTTAATTCAG 3'      |
| BRCA1 Exon 6/7rev-1                                   | 5' AAGAAGAAAACAAATGGTTTTAC 3'      |
| BRCA1 Exon 8f-1                                       | 5' GACATTTTAGTGTGTAAATTCCTG 3'     |
| BRCA1 Exon 8rev-1                                     | 5' ACAAATTATGACCAAGATTTTGG 3'      |
| BRCA1 Exon 9f-1                                       | 5' TGAACTCCTAACCTCAAATAATC 3'      |
| BRCA1 Exon 9rev-1                                     | 5' TTTACCTATATAACAACTGCACATAC 3'   |
| BRCA1 Exon 10f-1                                      | 5' TTCATTTCAACTAGAAAGTTTCTAAAG 3'  |
| BRCA1 Exon 10rev-1                                    | 5' TAGTCTAGTACCATTAAATCTATCAGAC 3' |
| Exon 11_1F                                            | 5' GTTTTTGAGTACCTTGTTATTTTTG 3'    |
| Exon 11_1R                                            | 5' ATTTTGTCTTCAATATTACTCTCTACTG 3' |
| Exon 11_2F                                            | 5' CTCCAAATCAGTAGAGAGTAATATTG 3'   |
| Exon 11_2R                                            | 5' CTGTCATGTCTTTTACTTGTCTG 3'      |
| Exon 11_3F                                            | 5' GTAACAAGCCAAATGAACAG 3'         |
| Exon 11_3R                                            | 5' CCTCTGAACTGAGATGATAGAC 3'       |
| Exon 11_4F                                            | 5' TCTAGGTTTTGTCTATCATCTCAG 3'     |
| Exon 11_4R                                            | 5' CTAGGACTCCTGCTAAGCTC 3'         |

|            |                               |
|------------|-------------------------------|
| Exon 11_5F | 5' ACATTAAGGAAAGTTCTGCTG 3'   |
| Exon 11_5R | 5' GCATAAACATTTAGCTCACTTC 3'  |
| Exon 12F   | 5' GTCCTGCCAATGAGAAGAAA 3'    |
| Exon 12R   | 5' TGTCAGCAAACCTAAGAATGT 3'   |
| Exon 13F   | 5' AATGGAAAGCTTCTCAAAGTA 3'   |
| Exon 13R   | 5' ATGTTGGAGCTAGGTCCTTAC 3'   |
| Exon 14F   | 5' CTAACCTGAATTATCACTATCA 3'  |
| Exon 14R   | 5' GTGTATAAATGCCTGTATGCA 3'   |
| Exon 15F   | 5' TGGCTGCCCAGCAAGTATG 3'     |
| Exon 15R   | 5' AACCAGAATATCTTTATGTAGGA 3' |
| Exon 16F   | 5' AATTCTTAACAGAGACCAGAAC 3'  |
| Exon 16R   | 5' AAAACTCTTCCAGAATGTTGT 3'   |
| Exon 17F   | 5' GTGTAGAACGTGCAGGATTG 3'    |
| Exon 17R   | 5' TCGCCTCATGTGGTTTTA 3'      |
| Exon 18F   | 5' GGCTCTTTAGCTTCTTAGGAC 3'   |
| Exon 18R   | 5' AGACCCATTTTCCCAGCATC 3'    |
| Exon 19F   | 5' CTGTCATTCTTCCTGTGCTC 3'    |
| Exon 19R   | 5' CATTGTTAAGGAAAGTGGTGC 3'   |
| Exon 20F   | 5' ATATGACGTGTCTGCTCCAC 3'    |
| Exon 20R   | 5' GGGAATCCAAATTACACAGC 3'    |
| Exon 21F   | 5' AAGCTCTTCCTTTTTGAAAGT 3'   |
| Exon 21R   | 5' GTAGAGAAATAGAATAGCCTCT 3'  |
| Exon 22F   | 5' TCCCATGAGAGGTCTTGCT 3'     |
| Exon 22R   | 5' GAGAAGACTTCTGAGGCTAC 3'    |
| Exon 23F   | 5' CAGAGCAAGACCCTGTCTC 3'     |
| Exon 23R   | 5' ACTGTGCTACTCAAGCACCA 3'    |
| Exon 24F   | 5' ATGAATTGACACTAATCTCTG 3'   |
| Exon 24R   | 5' GTAGCCAGGACAGTAGAAGGA 3'   |

| <b>RT-PCR of the full-size human BRCA1 gene expressed from the HAC in CHO cells (the products were used for sequencing analysis)</b> |                                    |
|--------------------------------------------------------------------------------------------------------------------------------------|------------------------------------|
| <u>BRCA1RT1 (cDNA synthesis)</u>                                                                                                     | 5' ATGGATTTATCTGCTCTT 3'           |
| BRCA1start                                                                                                                           | 5' ATGGATTTATCTGCTCTTCGCGTTG 3'    |
| BRCA1RT1rev                                                                                                                          | 5' CATGTGAGTCATCAGAACCTAACAGTTC 3' |
| <u>BRCA1RT2 (cDNA synthesis)</u>                                                                                                     | 5' ACAGAAAAAAGGTAGATC 3'           |
| BRCA1RT2f                                                                                                                            | 5' ACAGAAAAAAGGTAGATCTGAATGCTG 3'  |
| BRCA1RT2rev                                                                                                                          | 5' CAGCTCTGGGAAAGTATCGCTGTC 3'     |
| <u>BRCA1RT3: (cDNA synthesis)</u>                                                                                                    | 5' ATAAAGAAAAAAGTACAAC 3'          |
| BRCA1RT3f                                                                                                                            | 5' CAACCAAATGCCAGTCAGGCAC 3'       |
| BRCA1RT3rev                                                                                                                          | 5' ATTCATTAATACTGGAGCCCACTTC 3'    |
| <u>BRCA1RT4: (cDNA synthesis)</u>                                                                                                    | 5' AAAACTTTGAGGAACATT 3'           |
| BRCA1RT4f                                                                                                                            | 5' TTTGAGGAACATTCAATGTCACCTG 3'    |
| BRCA1RT4rev                                                                                                                          | 5' GTTGCATGGTATCCCTCTGCTGAG 3'     |
| <u>BRCA1RT5: (cDNA synthesis)</u>                                                                                                    | 5' ATGATGAAGAAAGAGGAA 3'           |
| BRCA1RT5f                                                                                                                            | 5' GAAAGAGGAACGGGCTTGGAAAG 3'      |
| Exons15-21rev                                                                                                                        | 5' AAGGGTGAATGATGAAAGC 3'          |
| <u>3': (cDNA synthesis)</u>                                                                                                          | oligo dT18 commercial primer (IDT) |
| Exons15-21f                                                                                                                          | 5' CATTAGATGATAGGTGGTA 3'          |
| BRCA1stop                                                                                                                            | 5' TCAGTAGTGGCTGTGGGGGATC 3'       |
| <b>Sequence of BRCA1 cDNA</b>                                                                                                        |                                    |
| BRCA1sec0                                                                                                                            | 5' CATCTTTTAGATGTTTCAGGAGAG 3'     |
| BRCA1sec2:                                                                                                                           | 5' GGGAGTCTGAATCAAATGCCAAAG 3'     |
| BRCA1sec3                                                                                                                            | 5' GCAGCAGTATAAGCAATATGGAACTC 3'   |
| BRCA1sec4                                                                                                                            | 5' GTATCTCGTTACTGGAAGTTAGCACTC 3'  |
| BRCA1sec5                                                                                                                            | 5' TTTTACAAAACCCATATCGTATACCACC 3' |
| BRCA1sec6                                                                                                                            | 5' GGAAAGTTCTGCTGTTTTTAGCAAAG 3'   |
| BRCA1sec7                                                                                                                            | 5' AAGAGCAAAGCATGGATTCAAACCTTAG 3' |
| BRCA1sec8                                                                                                                            | 5' GAGTCTGGGCCACACGATTTGAC 3'      |
| BRCA1sec9                                                                                                                            | 5' CTGGGTGACCCAGTCTATTAAGAAAG 3'   |
| BRCA1rev1                                                                                                                            | 5' GCCTCACACATCTGCCCAATTG 3'       |

| <b>RT-PCR of hBRCA1 in CHO cells</b> |                                                           |
|--------------------------------------|-----------------------------------------------------------|
| Exons 15–21f                         | 5' CATTAGATGATAGGTGGTA 3'                                 |
| Exons 15–21 rev                      | 5' AAGGGTGAATGATGAAAGC 3'                                 |
| ERCC2 f2                             | 5' CTTCAGTTGTATGGACGCCTCCTTG 3'                           |
| ERCC2 rev2                           | 5' CGAGCCACCGAGAGCAGAATG 3'                               |
| <b>qPCR (SYBR green)</b>             |                                                           |
| h -cyclophilin1251F                  | 5' TGCAGTGAGTTCATGCATTTAGAG 3'                            |
| h-cyclophilin-1320R                  | 5' CGCAACAGATGTCTCAATTTTTG 3'                             |
| qPCR-PRKG1Bf                         | 5' GGGAAAAGATGCTTCTGGGAA 3'                               |
| qPCR-PRKG1Brev                       | 5' TTCGAAAGTGAAGCTCGGAAA 3'                               |
| ChXVI-F                              | 5' GTGACGATGGAGTTTAACTCAGGG 3'                            |
| ChXVI-R                              | 5' TGCTTCCGTTTCAGTTATGGGAAG 3'                            |
| D5Z1forward                          | 5' TAGACAGAAATATTCTCACAATCGT 3'                           |
| D5Z1 reverse                         | 5' GCCCTCAAAGCGCTCCAAG 3'                                 |
| D5Z2 forward                         | 5' TTTTGTGCAATTGGCAAATGGAG 3'                             |
| D5Z2 reverse                         | 5' AGACTGTTTCCTCACTGCTCT 3'                               |
| 21-IaF                               | 5' CTAGACAGAAGCCCTCTCAG 3'                                |
| 21-IaR                               | 5' GGGAAGACATTCCTTTTTTCACC 3'                             |
| 21-IbF                               | 5' GTAGTTTGTGGAAGTGGAC 3'                                 |
| 21-IbR                               | 5' CTGAGAATGCTGCTGTCTACC 3'                               |
| Satellite 2 F                        | 5' TCGCATAGAATCGAATGGAA 3'                                |
| Satellite 2 R                        | 5' GCATTGAGTCCGTGGA 3'                                    |
| <b>qPCR (TaqMan)</b>                 |                                                           |
| GAPDH                                | Hs.PT.39a.22214836 (IDT)                                  |
| SPANXBf                              | 5' CCCCTGTGAATCCAACGAG 3'                                 |
| SPANXBprobe                          | /56-FAM/CCG CAA CCT /ZEN/GCT CCT AAA AAA ATG<br>/3IABkFQ/ |
| SPANXBrev                            | 5' CCTGTAGCGAACCACTAGTATG 3'                              |
| PRB.DUX4                             | /56-FAM/TCA CCG GAT /ZEN/CCC AGA CCG<br>C/3IABkFQ/        |

|                                    |                                      |
|------------------------------------|--------------------------------------|
| FOR.DUX4                           | 5' TTCAGAATGAGAGGTCACGC 3'           |
| REV.DUX4                           | 5' CTTCTCAAAGGCTCGGAGG 3'            |
| <b>Pig specific primers</b>        |                                      |
| Pig specific f                     | 5' TTAAGTGGAGGAAGAAGG 3'             |
| Pig specific rev                   | 5' CATTATGACAGTTAAGCGG 3'            |
| Porcine f                          | 5' GCCTAAATCTCCCCTCAATGGTA 3'        |
| Porcine rev                        | 5' ATGAAAGAGGCAAATAGATTTTCG 3'       |
| <b>HPRT gene reconstitution</b>    |                                      |
| Lox137-R                           | 5' AGCCTTCTGTACACATTTCTTCTC 3'       |
| Rev #6                             | 5' GCTCTACTAAGCAGATGGCCACAGAACTAG 3' |
| SV40 PA term rev                   | 5' AATGGTTACAAATAAAGCAATAGCATCAC 3'  |
| <b>Hamster specific B2 repeats</b> |                                      |
| Cons B2-F                          | 5' CCATCTGTAATGAGATCTGATGC 3'        |
| Ham B2-F                           | 5'GCTCAGAGGTTAAGAGCACTGAC 3'         |
| Ham B2-R                           | 5'TGCTTCCATGTATATCTGCACAC 3'         |
